# Supplementary material
Source: MDPI journal article supplement (https://www.mdpi.com/2076-3417/12/9/4386)
Supplement: s1 [file s1]

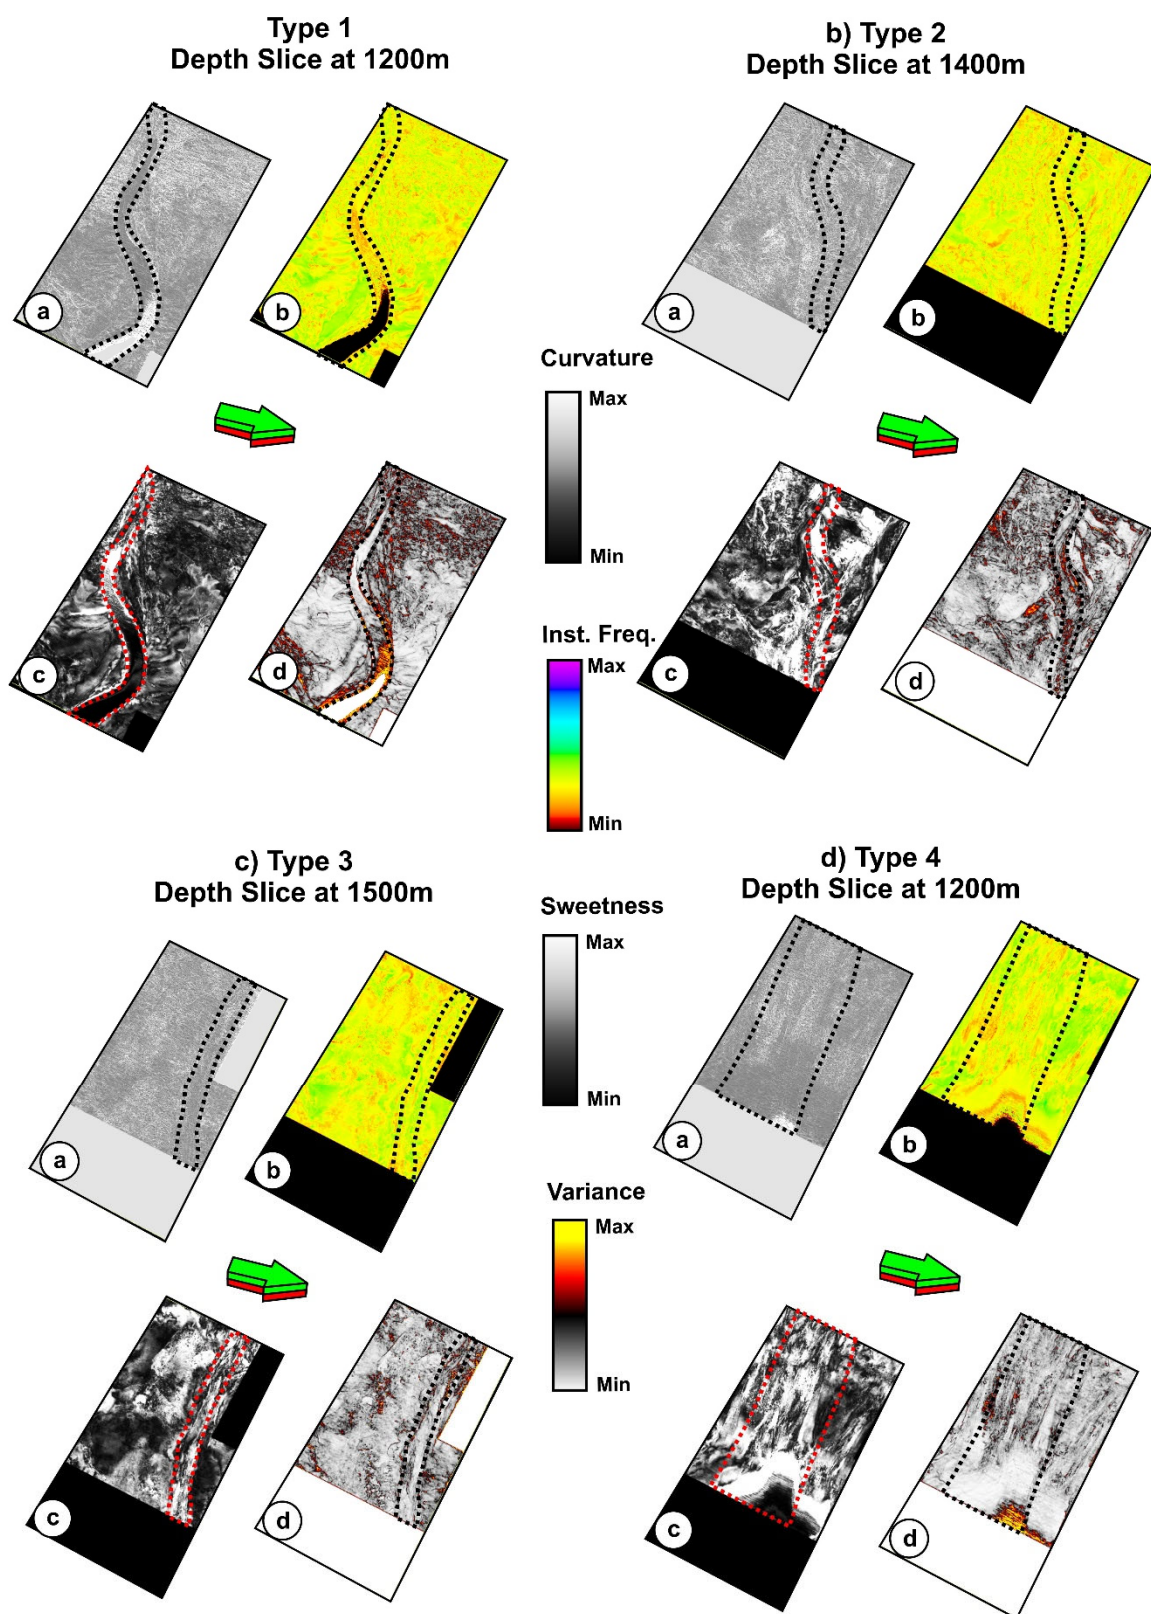

**Figure S1.** Seismic attribute of Four types of the channels complexes in the study area; a) curvature, b) instantaneous frequency, c) sweetness, and d) variance with channel delineation (dashed line).
